# Supplementary material for: Determination of Ce isotopes by TIMS and MC-ICPMS and initiation of a new, homogeneous Ce isotopic reference material
Source: Royal Society of Chemistry journal article supplement (doi:10.1039/b705306a), 2007-01-01
Supplement: b705306a.pdf [file b705306a.pdf]

**Electronic Supplementary Information (ESI): Derivation of equations used in the text.**

Definition of variables

- $I^m$  = Measured intensity  $I$  at mass  $m$  (in atomic mass units, amu)
- $I_{EI}^m$  = Contributing intensity  $I$  of element or element species ( $El$ ) to the total intensity measured at mass  $m$
- $\alpha$  = Exponential factor
- $\left(\frac{m^1 El}{m^2 El}\right)_{Const}$  = Constant isotope ratio of isotope  $m1$  and isotope  $m2$  of element  $El$ <sup>s</sup>
- $m(^{m1}El)$  = Accurate atomic mass of isotope  $m1$  of Element  $El$ <sup>s</sup>
- $R^8$  =  $^{18}O/^{16}O$

Throughout the text the exponential law (see, for example, Hart and Zindler<sup>2</sup> or Wombacher and Rehkämper<sup>3</sup>) is assumed to correct for instrumentally induced isotope fractionation.

**Equation (1)**

$$\left(\frac{^{136}Ce}{^{142}Ce}\right) = \frac{I^{136} - I_{Ba}^{136}}{I^{142} - I_{Nd}^{142}} \quad (1a)$$

$$\left(\frac{^{136}Ba}{^{137}Ba}\right)_{Const} = \frac{I_{Ba}^{136}}{I^{137}} \times \left(\frac{m(^{136}Ba)}{m(^{137}Ba)}\right)^\alpha$$

$$I_{Ba}^{136} = I^{137} \times \left(\frac{^{136}Ba}{^{137}Ba}\right)_{Const} \times \left(\frac{m(^{136}Ba)}{m(^{137}Ba)}\right)^{-\alpha} \quad (1b)$$

$$\left(\frac{^{142}Nd}{^{144}Nd}\right)_{Const} = \frac{I_{Nd}^{142}}{I^{144}} \times \left(\frac{m(^{142}Nd)}{m(^{144}Nd)}\right)^\alpha$$

<sup>s</sup> Taken from Rosman and Taylor<sup>1</sup> if not defined otherwise in the text.

$$I_{Nd}^{142} = I^{144} \times \left( \frac{{}^{142}Nd}{{}^{144}Nd} \right)_{Const} \times \left( \frac{m({}^{142}Nd)}{m({}^{144}Nd)} \right)^{-\alpha} \quad (1c)$$

Insert (1b) and (1c) into (1a) to obtain equation (1) given in text.

### Equations (4) and (5)

$$I_{142Ce^{16}O}^{158} = I^{158} - I_{140Ce^{18}O}^{158} \quad (4a)$$

$$I_{140Ce^{18}O}^{158} = I^{156} \times R^8 \quad (4b)$$

$$\left( \frac{{}^{140}Ce}{{}^{136}Ce} \right)_{Const} = \frac{I^{156}}{I^{152}} \times \left( \frac{m({}^{140}Ce^{16}O)}{m({}^{136}Ce^{16}O)} \right)^{\alpha}$$

$$I^{156} = I^{152} \times \left( \frac{{}^{140}Ce}{{}^{136}Ce} \right)_{Const} \times \left( \frac{m({}^{140}Ce^{16}O)}{m({}^{136}Ce^{16}O)} \right)^{-\alpha} \quad (4c)$$

$$R^8 = \left( \frac{{}^{142}Ce^{18}O}{{}^{136}Ce^{16}O} \right)_{Const} \times \left( \frac{{}^{136}Ce}{{}^{142}Ce} \right)_{Const} = \frac{I^{160}}{I^{152}} \times \left( \frac{{}^{136}Ce}{{}^{142}Ce} \right)_{Const} \frac{1}{\left( \frac{m({}^{142}Ce^{18}O)}{m({}^{136}Ce^{16}O)} \right)^{-\alpha}} \quad (5)$$

Inserting equations (4c) and (5) in (4b) yields

$$I_{140Ce^{18}O}^{158} = I^{160} \times \frac{\left( \frac{{}^{140}Ce}{{}^{142}Ce} \right)_{Const}}{\left( \frac{m({}^{140}Ce^{16}O)}{m({}^{142}Ce^{18}O)} \right)^{\alpha}} \quad (4d)$$

Inserting equation (4d) into (4a) yields equation (4) in the text.

## References

1. K. J. R. Rosman and P. D. P. Taylor, *Pure and Applied Chemistry*, 1998, **70**, 217-236.
2. S. R. Hart and A. Zindler, *International Journal of Mass Spectrometry and Ion Processes*, 1989, **89**, 287-301.
3. F. Wombacher and M. Rehkämper, *Journal of Analytical Atomic Spectrometry*, 2003, **18**, 1371-1375.
